# Supplementary material
Source: bioRxiv or medRxiv preprint supplement (http://www.biorxiv.org/highwire/filestream/2883/field_highwire_adjunct_files/3/009407-2.pdf)

**A**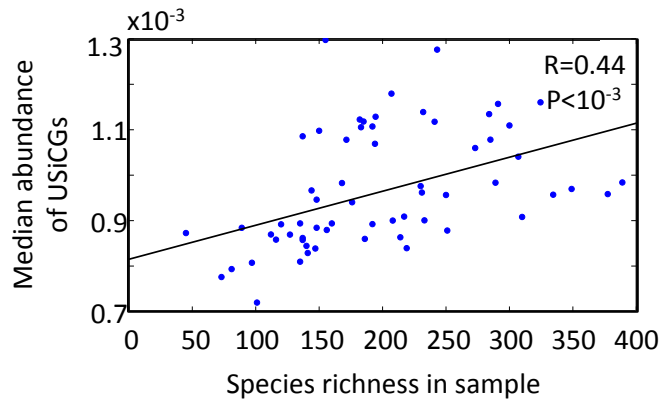**B**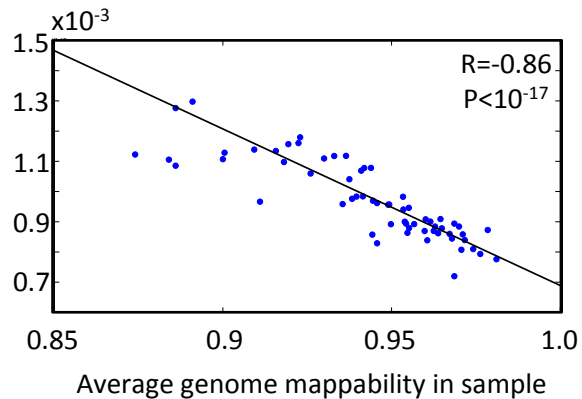**C**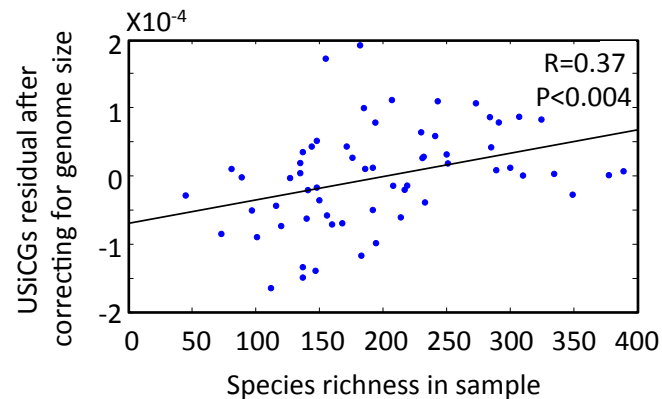**D**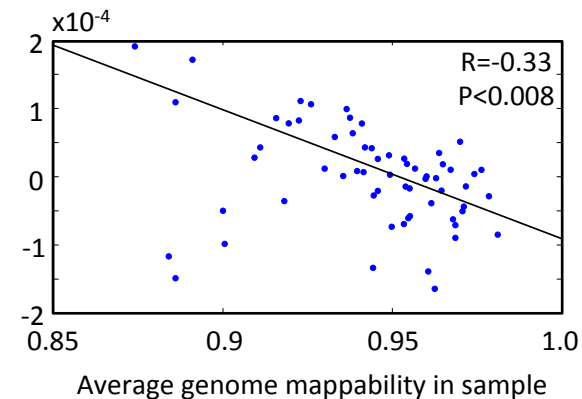

Supplement: Supplementary file [file 009407-2.pdf]
